# Supplementary material
Source: HighWire-hosted journal article supplement (https://bmjopen.bmj.com/content/15/1/e082066)
Supplement: inline-supplementary-material-1 [file inline-supplementary-material-1.pdf]

**QUESTIONNAIRE NEWBORNS ON NEONATAL SEPSIS**

| NUM      | QUESTIONS                                                                                                                                                                                                                                                                                                                                                                                                | MODALITIES OF RESPONSE                                                              |
|----------|----------------------------------------------------------------------------------------------------------------------------------------------------------------------------------------------------------------------------------------------------------------------------------------------------------------------------------------------------------------------------------------------------------|-------------------------------------------------------------------------------------|
| <b>Q</b> | <b>GENERALES INFORMATIONS</b>                                                                                                                                                                                                                                                                                                                                                                            |                                                                                     |
| q.1      | Survey date (MM/DD/YYYY)                                                                                                                                                                                                                                                                                                                                                                                 |                                                                                     |
| q.2      | Code data collectors                                                                                                                                                                                                                                                                                                                                                                                     | 1=col1<br>2= col2<br>3= col3<br>4= col4<br>5= col5<br>6= col6<br>7= col7<br>8= col8 |
| q.3      | Respondent's ID number                                                                                                                                                                                                                                                                                                                                                                                   |                                                                                     |
| q.4      | Health facilities                                                                                                                                                                                                                                                                                                                                                                                        | 1 = CHU Gabriel Touré<br>2 = CHU Kati<br>3 = CSRef de Kalanban<br>4 = CSRef CV      |
| q.5      | Start time (hh/mn)                                                                                                                                                                                                                                                                                                                                                                                       |                                                                                     |
| q.6      | End time (hh/mn)                                                                                                                                                                                                                                                                                                                                                                                         |                                                                                     |
| <b>R</b> | <b>SOCIO-DEMOGRAPHIC CHARACTERISTICS</b>                                                                                                                                                                                                                                                                                                                                                                 |                                                                                     |
|          | 1. Characteristics of newborn                                                                                                                                                                                                                                                                                                                                                                            |                                                                                     |
| r.1      | Age in day ?                                                                                                                                                                                                                                                                                                                                                                                             | _____ days                                                                          |
| r.2      | Birth order?                                                                                                                                                                                                                                                                                                                                                                                             |                                                                                     |
| r.3      | Sex of newborn?                                                                                                                                                                                                                                                                                                                                                                                          | 1 = Male<br>2 = Female                                                              |
|          | 2. OTHER CHARACTERISTICS                                                                                                                                                                                                                                                                                                                                                                                 |                                                                                     |
| r.4      | Prematurity                                                                                                                                                                                                                                                                                                                                                                                              | 0 = No ( $\geq 37$ SA)<br>1= Yes (< 37 SA)                                          |
| r.5      | Low birth weight?                                                                                                                                                                                                                                                                                                                                                                                        | 0 = No ( $\geq 2500$ )<br>1=Yes (< 2500)                                            |
| r.6      | Apgar score at 5 min?                                                                                                                                                                                                                                                                                                                                                                                    | 0 = normal ( $\geq 7$ )<br>1 = abnormal ( $< 7$ )                                   |
| r.7      | Did the newborn receive anything other than breast milk after giving birth?                                                                                                                                                                                                                                                                                                                              | 0 = Non<br>1 = Oui                                                                  |
| <b>S</b> | <b>DENIFITION DU SEPSIS NEONATAL</b>                                                                                                                                                                                                                                                                                                                                                                     |                                                                                     |
| s.1      | Sepsis (a temperature above 37.5°C or a sensation of heat to the touch, temperature below 35.5°C, convulsions, rapid breathing (> 60 breaths/minute), intense chest tightness, lethargy, swelling of the nose, grunting, bulging fontanel, pus draining from the ear, umbilical redness extending to the skin, sensation of cold (from previous history), numerous or severe skin pustules, difficult to | 0= No<br>1= Yes (2 of these signs)                                                  |

|          |                                                                                                                        |                                                                                                            |
|----------|------------------------------------------------------------------------------------------------------------------------|------------------------------------------------------------------------------------------------------------|
|          | wake up, cannot be soothed in 1 h, less normal movements, unable to feed and unable to attach to the breast or suckle) |                                                                                                            |
| s.2      | Onset of physical signs                                                                                                | 1 = >72h<br>2 = < 72h                                                                                      |
| <b>T</b> | <b>SOCIO-DEMOGRAPHIC CHARACTERISTICS OF THE MOTHERS</b>                                                                |                                                                                                            |
|          | Mother's full name                                                                                                     |                                                                                                            |
|          | Telephone number                                                                                                       |                                                                                                            |
|          | Telephone number of a relative                                                                                         |                                                                                                            |
| t.1      | How old are you?                                                                                                       | Years                                                                                                      |
| t.2      | What is your marital status?                                                                                           | 1 = Married<br>2 = Single<br>3 = Widowed<br>4 = Divorced                                                   |
| t.3      | Level of education                                                                                                     | 1 = No education<br>2 = Primary education<br>3 = Secondary level<br>4 = Higher education                   |
| t.4      | Provenance                                                                                                             | _____                                                                                                      |
| t.5      | Place of delivery                                                                                                      | 1= Hospital<br>2 = CSRéf<br>3 = Home<br>4= Other specify :                                                 |
| <b>U</b> | <b>MOTHER'S HISTORY</b>                                                                                                |                                                                                                            |
| u.1      | Medical history                                                                                                        | 1=None<br>2 HIGH BLOOD PRESSURE<br>3= Diabetes<br>4 =Sickle cell disease<br>5 = Asthma<br>6= Other specify |
| u.2      | Surgical history                                                                                                       | 1=None<br>2= Caesarean section<br>3= Cystectomy<br>4 = Extra uterine pregnancy<br>45 Other specify         |
| u.3      | Gynaecological history                                                                                                 | 1 = None<br>2=Leucorrhoea<br>3=Vulvar pruritus                                                             |

|          |                                                                                                                                                                                              |                                                                  |
|----------|----------------------------------------------------------------------------------------------------------------------------------------------------------------------------------------------|------------------------------------------------------------------|
|          |                                                                                                                                                                                              | 4=Dysuria<br>5=Dyspareunia<br>6=Dysmenorrhoea<br>7=Other specify |
| u.4      | Obstetrical history                                                                                                                                                                          |                                                                  |
| u.4.1    | Gestivity                                                                                                                                                                                    | 0 = 1 to 3 pregnancies<br>1 = > 3 pregnancies                    |
| u.4.2    | Parity                                                                                                                                                                                       | 0 = 1 to 3 children<br>1 = more than 3 children                  |
| <b>V</b> | <b>PREGNANCY HISTORY</b>                                                                                                                                                                     |                                                                  |
| v.1      | Antenatal care                                                                                                                                                                               | 0 = No<br>1 = Yes                                                |
| v.2      | Pregnancy type                                                                                                                                                                               | 0 = single<br>1 = multiple                                       |
| v.3      | Urinary tract infections during pregnancy (to be checked in the follow-up booklet or medical record)                                                                                         | 0 = No<br>1 = Yes                                                |
| v.4      | If so, which types?                                                                                                                                                                          |                                                                  |
| v.5      | Fever during pregnancy (to be checked in the follow-up booklet or medical record)                                                                                                            | 0 = No<br>1 = Yes                                                |
| v.6      | If so, give the cause (to be checked against the patient record or medical file)                                                                                                             | _____                                                            |
| v.7      | Infection: bacterial vaginosis or streptococcus B infections (abnormal discharge/leucorrhoea, pruritus, burning during pregnancy), to be checked in the follow-up booklet or medical record. | 0 = No<br>1 = Yes                                                |
| v.8      | If so, which types?                                                                                                                                                                          |                                                                  |
| v.9      | HIV infection (to be checked in the follow-up booklet or medical file)                                                                                                                       | 0 = No<br>1 = Yes                                                |
| v.10     | Genital bleeding during pregnancy                                                                                                                                                            | 0 = No<br>1 = Yes                                                |
| v.11     | If so, give the cause (to be checked in the follow-up booklet or medical file).)                                                                                                             | _____                                                            |
| v.12     | Prolonged labour                                                                                                                                                                             | 0 = No (< 12h)<br>1=Yes (>12h)                                   |
| v.13     | Prolonged rupture of membranes                                                                                                                                                               | 0 = No (< 12h)<br>1=Yes (>12h)                                   |
| v.14     | Number of digital vaginal examinations?                                                                                                                                                      | 0= < 5<br>1 = > 5                                                |
| <b>W</b> | <b>DELIVERY</b>                                                                                                                                                                              |                                                                  |
|          | Mode of delivery                                                                                                                                                                             | 1 = Bass voice<br>2 = Instrumental<br>3 = Caesarean section      |
|          |                                                                                                                                                                                              |                                                                  |
| <b>X</b> | <b>SOCIO-CULTURAL AND ECONOMIC CHARACTERISTICS</b>                                                                                                                                           |                                                                  |
|          | <b>Socio-economic characteristics</b>                                                                                                                                                        |                                                                  |
| x.1      | Monthly income of the person responsible for the health of the household (husband and/or wife)                                                                                               | 0 = < Minimum wage for all professions.                          |

|      |                                                                                                                                           |                                                                                                  |
|------|-------------------------------------------------------------------------------------------------------------------------------------------|--------------------------------------------------------------------------------------------------|
|      |                                                                                                                                           | 1= > Minimum wage for all professions.                                                           |
| x.2  | Financial accessibility                                                                                                                   | 0 = No (cannot pay for consultation + treatment)<br>1=Yes (can pay for consultation + treatment) |
| x.3  | If not, give reasons                                                                                                                      |                                                                                                  |
| x.4  | Geographical accessibility                                                                                                                | 0=No<br>1=Yes                                                                                    |
| x.5  | If not, give reasons                                                                                                                      |                                                                                                  |
| x.6  | Father's financial support                                                                                                                | 0=No<br>1=Yes                                                                                    |
|      | <b>Socio-cultural characteristics or context</b>                                                                                          |                                                                                                  |
|      |                                                                                                                                           |                                                                                                  |
| x.7  | No leaving home for seven days after delivery even if she is sick                                                                         | 0=No<br>1=Yes                                                                                    |
| x.8  | If so, why?                                                                                                                               |                                                                                                  |
|      | Hygiene practices                                                                                                                         |                                                                                                  |
| x.9  | Traditional treatment of the umbilicus (use of shea butter on the umbilicus of newborns, use of decoctions or other traditional products) | 0=No<br>1=Yes                                                                                    |
| x.10 | If so, which ones?                                                                                                                        |                                                                                                  |
| x.11 | Use of fabrics as a nappy for the newborn                                                                                                 | 0=No<br>1=Yes                                                                                    |
| x.12 | The mother washes her hands before holding the baby.                                                                                      | 0=No<br>1=Yes                                                                                    |
